# Supplementary material for: Bergamot Polyphenol Extract Reduces Hepatocyte Neutral Fat by Increasing Beta-Oxidation
Source: MDPI journal article supplement (doi:10.3390/nu14163434), 2022-08-20
Supplement: s1 [file s1]

## SAMPLE REPORT

Acquisition Date/Time 06-Nov-20 11:35:27  
 Acquisition Method Flavonoids cal. on Naringin  
 Chromera Version 4.2.0.6415  
 Dilution Factor 300  
 Report Date/Time 20-Nov-20 13:21:25  
 Sample Name BPF-Gold Lot. 1802-20  
 Vial Number 2

BPF-Gold Lot. 1802-20 : 284:10:400:10 : 1

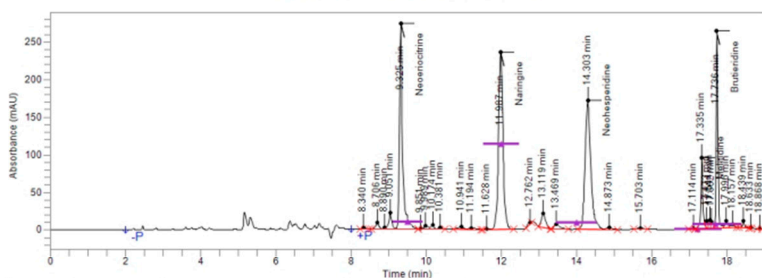

| Peak #       | Time   | Component Name | Area               | Height    | Final Amount        | Units |
|--------------|--------|----------------|--------------------|-----------|---------------------|-------|
| 25           | 17.736 | Brutieridine   | 744,325.4          | 263,757.9 | 54,533.3067         | µg/g  |
| 21           | 17.335 | Melitidine     | 375,035.4          | 94,608.6  | 26,946.3741         | µg/g  |
| 13           | 11.987 | Naringine      | 1,915,031.8        | 235,500.2 | 141,385.1452        | µg/g  |
| 5            | 9.325  | Neoeurocitrine | 1,587,619.4        | 273,788.4 | 132,517.0057        | µg/g  |
| 17           | 14.303 | Neohesperidine | 1,816,561.2        | 171,299.2 | 134,119.0245        | µg/g  |
| <b>Total</b> |        |                | <b>6,438,573.2</b> |           | <b>489,500.8563</b> |       |

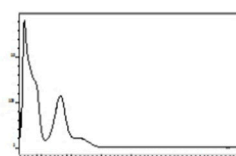

Peak: 5, 9.325min, Neoeurocitrine

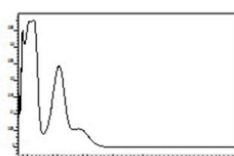

Peak: 13, 11.987min, Naringine

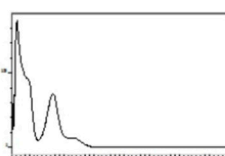

Peak: 17, 14.303min, Neohesperidine

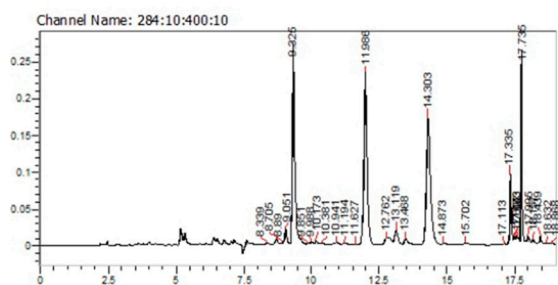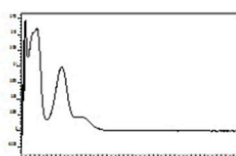

Peak: 21, 17.335min, Melitidine

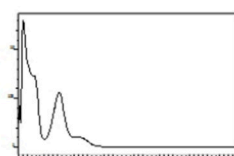

Peak: 25, 17.736min, Brutieridine

**Figure S1: Bergamot PF extract analysis of by HPLC-UV**

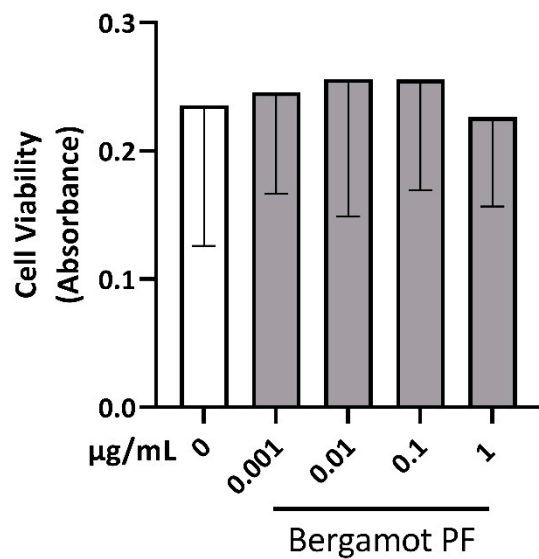

**Figure S2: Bergamot PF does not increase viability of McA Rh-7777 cells.** Semi-confluent cultures of rat hepatoma cell line (McA Rh-7777) incubated with bergamot PF extract (0.001- 0.01- 0.1- 1 µg/ml) for 24h. (A) Cell viability determined by MTT assay. Data are represented as mean  $\pm$  SD of three independent experiments. *Abbreviations: PF, polyphenol fraction; MTT assay, 3-(4,5-dimethylthiazol-2-yl)-2,5- diphenyltetrazolium bromide assay; SD, standard deviation*

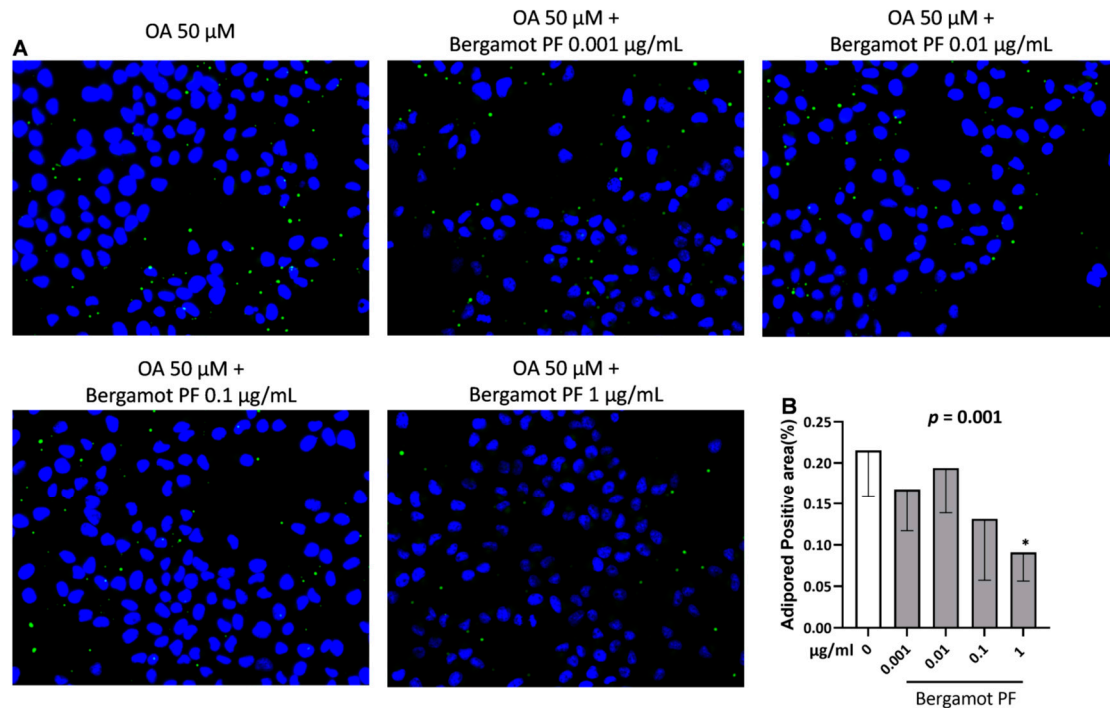

**Figure S3: Incubation with bergamot PF extract reduces triglyceride content in 2D cultured hepatocytes.** (A) Rat hepatoma cell line McA Rh7777 was cultured in 2D and incubated with 50  $\mu$ M of oleic acid and different concentrations of bergamot PF extract (0.001- 0.01- 0.1 - 1  $\mu$ g/mL) in regular medium without FBS for 24h. Triglyceride content was visualized by Adipored Assay kit. (B) Adipored area quantified per DAPI stained nuclei by Image J showed a dose dependent reduction with a statistically significant result also at dose 1  $\mu$ g/mL. Data shown as mean  $\pm$  SD of three independent experiments. Statistical analysis: Student's t-test vs. 0 \*p<0.05. Linear regression p=0.001 *Abbreviations: PF, polyphenols fraction; FBS, fetal bovine serum; OA, oleic acid; SD, standard deviation; 2D, two dimensional.*

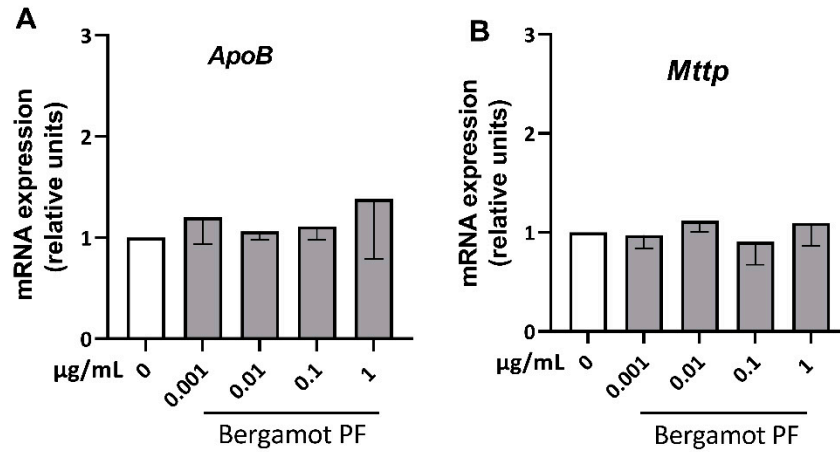

**Figure S4: Bergamot PF extract does not influence the levels expression of ApoB and Mttp on McA Rh-7777 cells.** Semi-confluent cultures of rat hepatoma cell line (McA Rh-7777) were incubated with 50 µM of oleic acid and different concentrations of Bergamot PF extract (0.001- 0.01- 0.1 - 1 µg/ml) in regular medium without FBS for 24h. Then, mRNA expression levels of (A) *ApoB* and (B) *Mttp* were measured by Real-time PCR. Data were analysed using the  $2^{-\Delta\Delta Cq}$  method and normalized to  $\beta$ -Actin. Data are represented as mean  $\pm$  SD of three independent experiments. Abbreviations: PF, polyphenol fraction; ApoB, Apolipoprotein B; Mttp, Microsomal triglyceride transfer protein; SD, standard deviation.

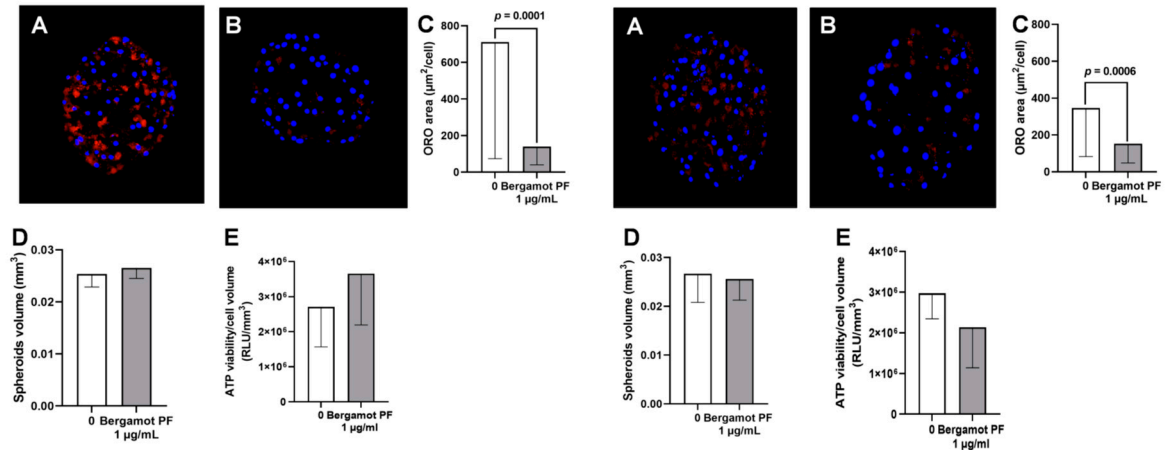

**Figure S5: Treatment with 1µg/mL bergamot PF extract reduces intracellular lipid content in human liver organoid.** (A) Human liver organoid was cultured as 3D spheroids for a total of 7 days. Initially, 48 hours after seeding the media replacement every 48 hours. Objective 20X. (B) Human liver organoid was cultured as 3D spheroids for a total of 7 days. Initially, 48 hours after seeding the media was supplemented with 1µg/mL bergamot PF extract for an additional 5 days with media replacement every 48 hours. Objective 20X. (D) The average volume was calculated measuring their long and short diameter by ZEN 2.3 Lite software (Zeiss). (E) For both spheroids, cellular ATP levels remained stable between the experimental groups. (C) Intracellular lipid content measured by Oil red-O staining showed a significant reduces after incubation with bergamot PF extract. Data shown as mean  $\pm$  SD in all groups. Statistical analysis: Mann-Whitney non-parametric test vs 0. Abbreviations: PF, polyphenols fraction; 3D, three dimensional; SD, standard deviation.

**Table S1.** Real time-PCR primer sequences.

| Gene            | Forward                           | Reverse                          |
|-----------------|-----------------------------------|----------------------------------|
| <i>Srebp-1c</i> | 5'-CCAGCCTTTGAGGATAACCA -3'       | 5'-TGCAGGTCAGACACAGGAAG-3'       |
| <i>Acox1</i>    | 5'-TCAACAGCCCAACTGTGACTTCCATTA-3' | 5'-TCAGGTAGCCATTATCCATCTCTTCA-3' |
| <i>Ppara</i>    | 5'-ATCCACGAAGCCTACC-3'            | 5'-CACACCGTACTTTAGCAAG-3'        |
| <i>β-ctin</i>   | 5'-GCCCTGAGGCACTCTTCCA-3'         | 5'-TTGCGGATGTCCACGTCA-3'         |

**Table S2.** Real time-PCR probes.

| Gene            | Probes        |
|-----------------|---------------|
| <i>Ucp2</i>     | Rn01754856_m1 |
| <i>Atg7</i>     | Rn01492725_m1 |
| <i>ApoB</i>     | Rn01499054_m1 |
| <i>Mttp</i>     | Rn01522963_m1 |
| <i>β-Actin</i>  | Rn00667869_m1 |
| <i>SREBP-1C</i> | Hs01088691_m1 |
| <i>ACOX1</i>    | Hs01074241_m1 |
| <i>PPARA</i>    | Hs00947539_m1 |
| <i>UCP2</i>     | Hs01075227_m1 |
| <i>ATG7</i>     | Hs00893766_m1 |
| <i>APOB</i>     | Hs01071209_m1 |
| <i>B-ACTIN</i>  | Hs01060665_g1 |
